1 Small apolipoprotein(a) isoforms may predict primary patency following peripheral arterial  
2 revascularization.

3

4 Short Title: Apo(a) size and peripheral revascularization

5

6 Marianna Pavlyha<sup>1</sup>, Madeleine Hunter<sup>2</sup>, Roman Nowygrod<sup>2</sup>, Virenda Patel<sup>2</sup>, Nicholas

7 Morrissey<sup>2</sup>, Danielle Bajakian<sup>2</sup>, Yihao Li<sup>1</sup>, Gisette Reyes-Soffer<sup>1</sup>

8

9 <sup>1</sup>Department of Medicine, Division of Preventive Medicine and Nutrition, Columbia University

10 Vagelos College of Physicians and Surgeons, New York, NY

11 <sup>2</sup>Department of Surgery, Division of Vascular Surgery, Columbia University Vagelos College of

12 Physicians and Surgeons, New York, NY

13

14 Corresponding Author:

15

16 Gisette Reyes-Soffer

17 630 West 168th street

18 P&S 10th floor, room 501

19 New York, NY 10032

20 Office: (212) 305-9298

21 [gr2104@cumc.columbia.edu](mailto:gr2104@cumc.columbia.edu)

22

23 **The authors have no competing interest**

1 **ARTICLE HIGHLIGHTS**

2 **Type of Research:**

3 Single-center prospective cohort study

4

5 **Key Findings:**

6 25 subjects with symptomatic PAD underwent open or  
7 endovascular lower extremity revascularization in a small  
8 cohort. Smaller apo(a) isoforms were associated with  
9 occlusion of the treated lesion(s) within 2-4 weeks  
10 [OR=1.97 (95% CI 1.01 - 3.86, p<0.05)], suggesting  
11 apo(a) isoform size as a predictor of primary patency in  
12 the early period after lower extremity intervention.

13

14 **Take Home Message:**

15 Subjects with high Lp(a) levels, generally have smaller  
16 apo(a) isoform sizes. We find that, in this small cohort,  
17 patients undergoing peripheral arterial revascularization  
18 subjects with small isoforms are at an increased risk of  
19 treated vessel occlusion in the perioperative period.

20

21 **Table of Contents Summary**

22 Subjects with symptomatic PAD requiring lower  
23 extremity revascularization have high median Lp(a)

1 levels. Individuals with smaller apo(a) weighted isoform  
2 size (*wIS*) have lower primary patency rates and/or  
3 require re-intervention.

4

5 **Key Words:** peripheral arterial disease, lipids, Lipoprotein(a), apo(a), isoforms

6

7 **Abstract**

8 Background: High lipoprotein (a) [Lp(a)] is associated with adverse limb events in patients  
9 undergoing lower extremity revascularization. Lp(a) levels are genetically pre-determined, with  
10 *LPA* gene encoding for two apolipoprotein (a) [apo(a)] isoforms. Isoform size variations are  
11 driven by the number of kringle IV type 2 (KIV-2) repeats. Lp(a) levels are inversely correlated  
12 with isoform size. In this study, we examined the role of Lp(a) levels, apo(a) size and  
13 inflammatory markers with lower extremity revascularization outcomes.

14

15 Methods: 25 subjects with chronic peripheral arterial disease (PAD), underwent open or  
16 endovascular lower extremity revascularization (mean age of 66.7±9.7 years; F=12, M=13;  
17 Black=8, Hispanic=5, and White=12). Pre- and post-operative medical history, self-reported  
18 symptoms, ankle brachial indices (ABIs), and lower extremity duplex ultrasounds were obtained.  
19 Plasma Lp(a), apoB100, lipid panel, and pro-inflammatory markers (IL-6, IL-18, hs-CRP, TNF $\alpha$ )  
20 were assayed preoperatively. Isoform size was estimated using gel electrophoresis and weighted  
21 isoform size (*wIS*) calculated based on % isoform expression. Firth logistic regression was used  
22 to examine the relationship between Lp(a) levels, and *wIS* with procedural outcomes: symptoms

1 (better/worse), primary patency at 2-4 weeks, ABIs, and re-intervention within 3-6 months. We  
2 controlled for age, sex, history of diabetes, smoking, statin, antiplatelet and anticoagulation use.  
3  
4 Results: Median plasma Lp(a) level was 108 (44, 301) nmol/L. The mean apoB100 level was  
5  $168.0 \pm 65.8$  mg/dL. These values were not statistically different among races. We found no  
6 association between Lp(a) levels and *wIS* with measured plasma pro-inflammatory markers.  
7 However, smaller apo(a) *wIS* was associated with occlusion of the treated lesion(s) in the  
8 postoperative period [OR=1.97 (95% CI 1.01 - 3.86,  $p < 0.05$ )]. The relationship of smaller apo(a)  
9 *wIS* with re-intervention was not as strong [OR=1.57 (95% CI 0.96 - 2.56),  $p = 0.07$ ]. We  
10 observed no association between *wIS* with patient reported symptoms or change in ABIs.  
11  
12 Conclusions: In this small study, subjects with smaller apo(a) isoform size undergoing peripheral  
13 arterial revascularization were more likely to experience occlusion in the perioperative period  
14 and/or require re-intervention. Larger cohort studies identifying the mechanism and validating  
15 these preliminary data are needed to improve understanding of long-term peripheral vascular  
16 outcomes.

17

## 18 **Introduction**

19 Lipoprotein (a) [Lp(a)] is causal for the development of atherosclerotic cardiovascular disease  
20 (ASCVD) and atherothrombosis as shown in epidemiological, Mendelian Randomization, and  
21 genome wide association studies (GWAS) <sup>1</sup>. Elevated Lp(a) levels are independently associated  
22 with incidence of major adverse cardiovascular events (MACE) and major adverse limb events  
23 (MALE) after lower extremity endovascular <sup>2</sup> or open surgery <sup>3</sup> while controlling for other risk

1 factors. Despite this, measurement of Lp(a) levels is not standard of care in those undergoing  
2 vascular intervention. Lp(a) particles contain two main apolipoproteins: B100 [apoB100] and  
3 apolipoprotein(a) [apo(a)]. Individuals can express one or two apo(a) isoforms and these vary in  
4 size depending on the number of Kringle-IV type 2 (KIV-2) repeats that are encoded by the *LPA*  
5 gene. Plasma Lp(a) levels and apo(a) isoform size are inversely correlated, with smaller  
6 isoforms generally dominating<sup>1</sup>. There are well described mechanisms linking high levels of  
7 Lp(a) and atherosclerosis, including complement activation, inflammatory, and coagulation  
8 pathways<sup>1</sup>. Apo(a) can potentiate atherothrombosis through presence of lysine binding sites that  
9 allow accumulation of lipid in the arterial wall and activation of inflammatory pathways,  
10 owing to its binding of oxidized phospholipids (OxPL)<sup>4 5</sup>. High Lp(a) levels have also been  
11 association with enhanced expression of adhesion molecules in endothelial cells and pro-  
12 inflammatory interleukins in monocytes and macrophages<sup>6</sup>. Finally, apo(a) has evolved from  
13 the plasminogen gene through duplication and remodeling<sup>7</sup> and its homology with plasminogen  
14 allows it to compete for its binding site, inhibiting thrombolysis and indirectly promoting a  
15 prothrombotic state. These mechanisms are of interest in vascular patency.

16  
17 Numerous studies show that high Lp(a) levels are associated with increased incidence of  
18 claudication, symptoms progression, re-stenosis after intervention, hospitalization, and limb  
19 amputation<sup>8</sup>, and those with high Lp(a) have a higher risk of combined PAD outcomes after  
20 adjusting for other traditional risk-factors. Few studies, however, have looked at the association  
21 between apo(a) isoform size and peripheral arterial surgical outcomes. Available data suggests  
22 that both increased Lp(a) levels and the presence of small apo(a) isoforms are associated with the  
23 increased incidence of symptomatic PAD<sup>9 10</sup>. Whereas small apo(a) isoforms were shown to be

1 independently associated with three-fold increase in risk of major adverse cardiovascular events  
2 after coronary artery bypass grafting (CABG) at long term follow up <sup>11</sup>, the role of this Lp(a)  
3 component on lower limb outcomes have not been explored. In view of previous findings and  
4 needs in the field, we developed a study using available stored plasma samples and outcomes  
5 data on subjects with PAD who underwent lower extremity revascularization, yet they had no  
6 history of Lp(a) measurement. We examined the relationships between apo(a) isoform size,  
7 primary patency, and rate of re-intervention. In addition, given apo(a)'s role in propagating the  
8 inflammatory cascade implicated in atherosclerotic plaque formation <sup>12 13 14</sup>, the relationship of  
9 pro-inflammatory markers (IL-6, IL-18, hs-CRP, TNF $\alpha$ ) with apo(a) size and surgical outcomes  
10 were investigated.

11  
12 There are current studies focused on lowering Lp(a) by targeting the apo(a) component in phase  
13 3 of development <sup>15</sup>, highlighting the need to understand which populations are at increased  
14 disease risk and would benefit from treatment. Our small study provides preliminary insights that  
15 can be used to design larger studies in patients with advanced PAD. These studies may assist  
16 with improving risk prediction, stratification, and medical optimization of surgical patients with  
17 high Lp(a).

18

## 19 **Methods**

20 We analyzed data from all 27 participants recruited from the Columbia University Irving  
21 Medical Center (CUIMC) Vascular Surgery Clinic into a prospective cohort study  
22 [Anthropometric and Biomarker Assay, and Lower Extremity Arterial Revascularization  
23 (ABALEAR)] between June 2018 and March 2021, **Supplemental Figure 2**. The study protocol

1 was approved by the CUIMC Institutional Review Board (AAAL7756). Inclusion criteria  
2 encompassed adult subjects with a clinical diagnosis of PAD, who were planned to undergo non-  
3 emergent revascularization (open or endovascular) of the affected lower extremity. Those with  
4 ischemic wounds, active infectious process, or cardiovascular intervention within 12 months of  
5 enrollment were excluded. Two of the participants who underwent only diagnostic angiogram  
6 were also excluded from final analysis. The type of intervention was at the discretion of the  
7 treating provider.

8  
9 *Recruitment/Enrollment:* Subjects that met inclusion and exclusion criteria were contacted prior  
10 to their scheduled operation and informed consent was obtained. Medical and social history were  
11 collected by a licensed health professional, including demographic information (age, sex, self-  
12 reported race-ethnicity (SRRE)), history of smoking, hypertension (HTN), diabetes, carotid  
13 artery disease (CAD) or dyslipidemia. Medication use [antihypertensives, statins, antiplatelet  
14 (AP), direct oral anticoagulant (DOAC)] and symptoms of rest pain or claudication (ambulatory  
15 distance in city blocks) were recorded. A pre-operative physical exam was performed, which  
16 included distal pulses, a lower extremity arterial duplex ultrasound (US), ankle brachial index  
17 (ABI), and body mass index (BMI). On the day of the surgical procedure, arterial blood samples  
18 were collected using EDTA tubes; plasma was separated and stored at  $-80^{\circ}\text{C}$ .

19  
20 *Study Follow-up (2-4 weeks and 3-6 months):* Participants were seen in the office for their post-  
21 operative visits by their respective providers. During these visits, physical exam (pulses, US,  
22 ABIs) to assess for primary patency and the trajectory of self-reported subjective symptoms were  
23 determined based on presence or resolution of rest pain and changes in walking distance. These

1 were then categorized as ‘improved,’ ‘worsened’ or ‘stayed the same.’ In cases of multiple  
2 vessels intervention, absent blood flow in the most proximal intervened vessel constituted  
3 occlusion. If multiple vessels below the popliteal artery trifurcation were intervened on,  
4 multiphasic in-line flow preserved in at least one of the vessels constituted patency. Palpable  
5 pulses over the graft and distally constituted patency. Two subjects did not have a complete US  
6 assessment at first follow-up and were excluded from sub-analysis. Change in ABI<sup>16</sup>  
7 measurements were categorized as improved from pre-operative measurement vs not improved  
8 (worsened or the same). Of note, ABI measurements falsely elevated due to calcified non-  
9 compressible vessels, incomplete, or missing for at least one of the visits were excluded from the  
10 sub-analysis. Hence, the available ABI data is limited. Toe pressures were not available on this  
11 cohort. In addition to the above, the 3-6 months visit included records of any interval  
12 interventions on the ipsilateral extremity.

13  
14 Plasma Lp(a), apoB100, lipids [triglycerides (TG), total cholesterol(C), high density lipoprotein  
15 (HDL)] were automatically measured on Integra 400 plus (Roche). Plasma LDL-C levels were  
16 calculated using the Friedewald formula (one subject had a TG level >400mg/dL and was not  
17 reported). Plasma apoB100 levels were measured by a human enzyme-linked immunosorbent  
18 assay (ELISA) from Mabtech, Inc, Cincinnati, OH. Lp(a) plasma concentration were measured  
19 using the isoform-independent sandwich ELISA developed by the Northwest Lipid Metabolism  
20 and Diabetes Research Laboratory at Medpace, Inc. Apo(a) isoform size measurements were  
21 performed by the same laboratory using agarose gel electrophoresis. ChemiDoc MP Imaging  
22 System was used to determine the isoforms using in-house standards and relative expression of  
23 each isoform was reported. Weighted isoform size (*wIS*) was calculated using the % isoform



1 expression (two isoform masses were multiplied by their relative expression). Pro-inflammatory  
2 markers Interleukin-6 (IL6), Interleukin-18 (IL-18) were measured using ELISA kits (D6050,  
3 R&D Systems, Minneapolis, MN) and (DY318-05, R&D Systems, Minneapolis, MN),  
4 respectively. High sensitivity C-reactive protein (hs-CRP) and Tumor Necrosis Factor alpha  
5 (TNF $\alpha$ ) were measured on an Integra400plus (Roche) using standardized methods at the Irving  
6 Institute for Clinical and Translational Research Biomarkers laboratory at CUIMC.

7

## 8 **Statistical Analysis**

9 All data were analyzed using standard R software (Version 4.2.2). Normally distributed variables  
10 were summarized by means and standard deviations (SD). Lp(a) levels and TGs were  
11 summarized by median and interquartile range. The relationship of Lp(a) levels with *wIS* in the  
12 three SRRE groups was studied by Analysis of Variance (ANOVA). Racial differences in Lp(a)  
13 levels and *wIS* were assessed using the median test. Due to small samples size, an  
14 implementation based on the Firth logistic regression<sup>17</sup> was chosen to examine the relationship  
15 between *wIS* with procedural outcomes: change in symptoms, primary patency of treated  
16 lesion(s), change in ABIs, and re-intervention within 3-6 months. Results were reported as odds  
17 ratios (OR). Sex, age, smoking status, history of diabetes, statin, antiplatelet and DOAC use were  
18 considered as potential confounders, according to the literature, and were included in the  
19 regression<sup>18 19 20 21</sup>. HTN and BMI were not integrated into the model based on their role in  
20 published studies of surgical outcomes<sup>22 23</sup>. We did not control for history of CAD, as literature  
21 shows that most individuals with diagnosis of PAD have some degree of CAD and at least 60%  
22 have significant CAD<sup>24</sup>.

23

## 1 **Results**

2 *Baseline Characteristics:* Subject demographics, lipid and lipoprotein levels are shown in **Table**

3 **I.** The study population included 12 females and 13 males with a mean age of  $66.7 \pm 9.7$  years.

4 Our cohort was multiethnic with 8 Blacks, 5 Hispanics, and 12 Whites, representative of the

5 available population at our institution. All subjects were Rutherford stage 3 and 4. 5 subjects

6 underwent open revascularization and 20, endovascular. Majority of the subjects underwent

7 infra-inguinal intervention (N=23) and 6 required re-intervention within 3-6 months. Individuals

8 were mildly overweight and lipid levels consistent with a population being treated for

9 dyslipidemia. Despite use of lipid lowering therapies, the mean apoB100 levels were  $168.0 \pm$

10  $65.8$  mg/dL. Median plasma Lp(a) level was 108 (44, 301) nmol/L. Primary patency rates at 2-4

11 weeks and 3-6 months were 76% and 68%. Rate of re-intervention measured at 3-6-months visit

12 was 24%.

13

14 *Lp(a) levels and Isoform Size:* Previous reports show that high Lp(a) levels are associated with

15 worse outcomes after surgical intervention. We found that most of the individuals in our cohort

16 had high Lp(a) levels. The mean *wIS* was  $18.4 \pm 4.1$  and as expected, there was an inverse

17 relationship between Lp(a) levels and *wIS* ( $R^2 = 0.20$ ;  $p=0.02$ ), **Figure 1**. Most individuals

18 express two apo(a) isoforms, however in our small diverse cohort, we found that half (N=12)

19 individuals expressed only a single isoform, **Supplemental Table I**, with predominance of the

20 small isoform, **Figure 2**.

21

22 *Relationship of Lp(a) levels and Isoforms with surgical outcomes:* We did not find significant

23 associations between Lp(a) levels and post-surgical symptoms, ABI, primary patency, or re-

1 intervention, **Table IIb**. Surgery type did not affect this result. However, *wIS* was significantly  
2 correlated with primary patency at 2-4 weeks [OR=1.97 (95% CI 1.01 - 3.86,  $p<0.05$ )], **Table**  
3 **IIa**. Controlling for SRRE did not change these study outcomes. We observed a trend between  
4 *wIS* and re-intervention in the 3-6 months period [OR=1.57 (95% CI 0.96 - 2.56),  $p=0.07$ ].  
5 When we used predominant apo(a) isoform size as the primary variable in our model, and  
6 adjusted for plasma Lp(a) levels, our observed effect of apo(a) size on primary patency remained  
7 statistically significant [OR=2.01, (CI 1.03 - 3.93)  $p<0.05$ ], suggesting that apo(a) was a stronger  
8 a predictor of outcomes compared to Lp(a) levels in this cohort.

9  
10 The type of surgical procedure could have affected our study outcomes, however when we  
11 assessed the relationship between *wIS* isoform size and primary patency for subjects that only  
12 underwent endovascular intervention, we noted a similar trend [OR=1.67 (95% CI 0.95 - 2.94),  
13  $p=0.08$ ]. We did not see an association between *wIS* and patient reported symptoms or change in  
14 ABIs at 3-6 months. It is notable, however, that our sample size for analysis of ABIs was much  
15 smaller (N=14) due to inability of all subjects to undergo the test reliably (ex. pain, non-  
16 compliant calcified vessels resulting in falsely elevated results) or missing measurement from  
17 some visits.

18  
19 As expected, inflammatory markers IL-18 and hs-CRP were higher in this cohort when  
20 compared to published levels in healthy cohorts, **Table III**. However, we found no significant  
21 relationship between plasma Lp(a) levels or *wIS* with IL-6, IL-18, hs-CRP, or TNF $\alpha$ .  
22 Additionally, inflammatory markers were not associated with our surgical outcomes.

23

24

## 1 **Discussion**

2 High Lp(a) levels are associated with adverse limb events in patients with symptomatic PAD  
3 undergoing lower extremity revascularization<sup>25 26 2</sup>. International guidelines (Canadian<sup>27</sup> and  
4 ECC<sup>28</sup>) advocate for all individuals to have Lp(a) measured once in a lifetime. In the United  
5 States, the American Heart Association (AHA) suggest using Lp(a) levels as a ‘risk enhancer’<sup>29</sup>.  
6 However, there are no specific guidelines for Lp(a) measurements in patients with advanced  
7 PAD that are referred for surgical intervention. All subjects in our study have been diagnosed  
8 with at least one metabolic disease, however, they were not screened for Lp(a) by their primary  
9 providers; and the majority were found to have elevated levels.

10

11 Although our study sample is small, which limits the generalizability of the results, it features a  
12 good representation based on gender and race. These data can be used to develop well controlled  
13 cross-sectional studies that can examine the role of apo(a) in larger populations with PAD. Most  
14 individuals at risk or that have ASCVD, obtain laboratory measurement of low-density  
15 lipoprotein cholesterol (LDL-C), an apoB100 containing particle. Physicians rely on these  
16 measurements for prescribing lipid therapies, such as statins, in clinical practice. We observed  
17 that in our cohort, 76% of individuals were prescribed statins. While statins significantly lower  
18 LDL-C, they tend to increase Lp(a) by about 11%<sup>1</sup>. It is important to note, however, that the  
19 laboratory levels of LDL-C in plasma are known to be confounded by the presence of Lp(a)-C<sup>30</sup>,  
20 which contains both apoB100 and apo(a). The reason for this overlap lies in similar plasma  
21 densities between Lp(a) and LDL particles. Thus, in patients with high levels of Lp(a) the actual  
22 LDL-C is lower from the reported value and some investigators believe apoB100 to be a more  
23 accurate measure of cardiovascular risk compared to LDL-C<sup>31</sup>. This is important, because most

1 vascular patients are prescribed statins, which works via increased LDL receptor expression,  
2 facilitating clearance of LDL-C, but not Lp(a). Patients that have elevated LDL-C while on  
3 optimal LDL lowering therapy would benefit from having their Lp(a) measured and treated, as  
4 there is a high probability that the increased cholesterol is carried by Lp(a) particles. We observe  
5 this in some patients in our population as well and this may explain why some patients, despite  
6 LDL-C lowering by statins, remain at risk<sup>32</sup>. Two out of 19 subjects in the study who were taking  
7 statins had above normal LDL-C levels; both had Lp(a) measurements > 200 nmol/L. In this  
8 population where Lp(a) is high, this particle may carry most of the cholesterol.  
9  
10 Whereas there has been great interest in Lp(a) levels and surgical outcomes, few studies have  
11 looked at the role of apo(a) size in vascular surgery, and specifically, there are no existing reports  
12 on patency after lower extremity revascularization. The *LPA* gene encodes for two apo(a)  
13 isoforms that comprise the Lp(a) particle. Variations in size of the apo(a) isoforms are driven by  
14 the number of KIV-2 repeats. Small number of KIV-2 repeats lead to small apo(a) size and are  
15 associated with higher Lp(a) levels, posing an increased risk for cardiovascular disease,  
16 including PAD<sup>9</sup>. Similar to other cohorts<sup>1</sup>, the current study finds an inverse association  
17 between plasma Lp(a) levels and apo(a) allele size, with smaller isoforms associated with higher  
18 Lp(a) levels<sup>33</sup>. Whereas ~20% of the general population is expected to have high Lp(a) and  
19 express two apo(a) isoforms<sup>1</sup>, close to half of our subjects with high median Lp(a) expressed  
20 only one isoform size, **Supplemental Table I**. Previous studies in individuals with PAD showed  
21 that both increased Lp(a) serum concentrations (75th percentile) and the small apo(a) phenotype  
22 are strongly associated with symptomatic PAD, independent of other confounders<sup>9</sup>. We did not  
23 see any significant correlation between Lp(a) levels and outcomes, but when controlled for Lp(a)

1 levels, the predictive association of *wIS* with primary patency was still statistically significant.  
2 Although data in the literature regarding disease predictability of Lp(a) vs apo(a) is conflicting,  
3 there is evidence that the strength of the association is higher for apo(a) isoform size in certain  
4 diseases<sup>34</sup>. To our knowledge, there are no reports assessing the correlation between apo(a) size  
5 and primary patency. Our preliminary study finds that small apo(a) size strongly correlates with  
6 primary patency within 2-4 weeks with a trend towards a higher rate or re-intervention at 3-6  
7 months. Although more comprehensive evaluation of the prognostic relationship between apo(a)  
8 size and these outcomes of peripheral arterial interventions would be served in a randomized or  
9 cross-sectional study, these results support what is already known about apo(a)'s mode of action.  
10 We postulate that the probable mechanisms lie in the apo(a)'s kringle structure having homology  
11 with fibrinolytic proenzyme plasminogen, but inactive in fibrinolysis. Small apo(a) isoform size  
12 resulting from low *LPA* KIV-2 number of repeats can slow fibrinolysis and thus indirectly  
13 promote thrombosis, leading to increased risk of perioperative complications such as graft  
14 occlusion or thromboembolic events<sup>35</sup>. Additionally, apo(a) potentiates thrombosis by binding  
15 and inactivating tissue factor pathway inhibitor (TFPI)<sup>36</sup>. This is especially important, as many  
16 of peripheral arterial intervention are performed to aid in wound healing and this period may be  
17 imperative for patients with tissue loss. These pro-thrombotic action of the apo(a) could also  
18 explain the high rate of early re-intervention in this cohort of patients with high Lp(a),  
19 particularly as 5 our 6 subjects in the group requiring re-intervention had small apo(a),

20 **Supplemental Figure 1.**

21

22 A study from a UK biobank studied approximately 460 thousand participants and showed  
23 significant differences in Lp(a) concentrations across racial subgroups, specifically with higher

1 Lp(a) levels seen within South Asian and Black population compared to Whites<sup>37</sup>. Although on  
2 average Hispanics had higher values than Whites in our cohort, there were no statistically  
3 significant differences in Lp(a) values and apo(a) size among different races and race had no  
4 impact on most surgical outcomes. This could be due to our limited sample size.

5  
6 Some of Lp(a)'s role in disease risk has been linked to inflammatory profiles. Specifically,  
7 elevated TNF- $\alpha$ , IL-6, and CRP levels<sup>12,38</sup> at baseline correlate with worse vascular outcomes in  
8 patients with diabetes, PAD, and chronic limb-threatening ischemia undergoing endovascular  
9 procedures<sup>14</sup>. We did not find any significant correlations with circulating inflammatory markers  
10 and Lp(a), *w/IS* or surgical outcomes, however, we did not measure OxPLs which may add new  
11 information in PAD patients as it has in other described populations<sup>39</sup>. Of note, it has also been  
12 reported that statins decreased the serum levels of hs-CRP<sup>12</sup> and downregulate IL-6<sup>13</sup>. Majority  
13 of our subjects were taking high-dose statins (which also tend to increase Lp(a)) and may be  
14 contributing to our observations.

15  
16 Although there are no currently available targeted therapies to treat high Lp(a), some agents  
17 available in the United States that lower apoB100 and LDL-C also decrease Lp(a) modestly,  
18 such as niacin, Ezetimibe, and PCSK9 inhibitors. The FDA has also recently approved  
19 lipoprotein apheresis for high-risk cases with Lp(a) >60mg/dL and LDL-C >100 mg/dL and with  
20 either documented CAD or PAD<sup>1</sup>. The two apo(a) targeted therapies, antisense oligonucleotides  
21 and siRNA and are also in phase 3 studies and are expected to report their initial results in 2024.  
22 While we wait for this data, new studies now suggest the benefit of DAPT in patients with high  
23 Lp(a)<sup>40</sup>. Particularly, recent outcomes in these patients undergoing percutaneous coronary

1 intervention (PCI), showed that prolonged DAPT (>1 year) reduced ischemic cardiovascular  
2 events, all-cause mortality, cardiac mortality, and definite/probable stent thrombosis, without  
3 increase in clinically relevant bleeding risk compared with  $\leq$  1-year DAPT<sup>41</sup>. Data from this  
4 small study cohort raise the question whether we need to rethink risk assessment and post-  
5 operative management in patients high Lp(a) and small apo(a) size undergoing lower extremity  
6 interventions. As the importance of Lp(a) becomes more recognized in clinical practice<sup>37,42</sup>, and  
7 we review cardiovascular outcome data from phase 3 apo(a) targeted treatments, developing  
8 larger studies that have more stringent control of patient selection and type of intervention would  
9 serve as the next step in validating the generalizability of the current findings.

10

11 Understanding the impact of apo(a) isoform size on Lp(a) levels and surgical outcomes may  
12 guide risk stratification and therapeutic decision-making when it comes to pre-operative  
13 optimization and medical management post-operatively. Lp(a) levels are stable throughout  
14 lifetime. Although measuring apo(a) size may not be feasible in all patients and it currently not  
15 used in clinical practice, as genetic testing becomes more widely available, assessing KIV-2 size  
16 associated with the *LPA* gene may help identify individuals at higher risk of developing PAD  
17 and worse outcomes. Given Lp(a) genetic predisposition and low variability of levels throughout  
18 lifetime, one measurement may be sufficient and is the standard of care in many European  
19 countries<sup>28</sup>.

20

21 Further research in larger cohorts is needed to establish a more robust understanding of the  
22 mechanisms and impact of apo(a) isoform size on surgical outcomes in patients PAD.



1 Randomized clinical trials to explore potential medical therapy strategies to mitigate associated  
2 risks would aid in providing guidelines for perioperative management of these individuals.

3

#### 4 **Study Limitations**

5 Overall, this was a sample of convenience. Subject samples and prospectively collected data  
6 from ongoing biomarker study (ABALEAR) were available to our lipid team to examine  
7 additional affecters on surgical outcomes. Although subject baseline characteristics are  
8 comparable to larger cohorts, we acknowledge that sample size is small and significantly limit  
9 the generalizability of the results. We used firth logistics regression to account for small sample  
10 size. Additionally, the cohort is heterogenous in terms of presenting symptoms with surgical  
11 interventions geared towards each patient's needs, but ultimately 'no leg is alike,' and the cohort  
12 represents a diverse spectrum of lower extremity disease and intervention seen in vascular  
13 surgery clinics. Additionally, due to limited size, associations between peripheral interventions  
14 and Lp(a) levels/apo(a) size was done without correction for multiple testing.

15

#### 16 **Conclusion**

17 In this limited cohort, most subjects with chronic symptomatic PAD had elevated Lp(a) levels  
18 without being screened by their medical providers outside of the study, pointing to the need to  
19 increase awareness for Lp(a) screening in vascular patients. Small apo(a) isoform expression  
20 could be an important risk predictor not only for the development of PAD, which has already  
21 been established in literature, but also as a driver of worse short term surgical outcomes. Further  
22 studies identifying the mechanism and relationship of these findings to long-term peripheral

1 vascular outcomes are warranted, specifically identifying the role of apo(a) size among different  
2 sexes and races in larger well controlled cohorts.

3

#### 4 **Acknowledgements**

5 We would like to acknowledge Anastasiya Matveyenko<sup>1</sup> and Srinivas Cherukuri<sup>1</sup> for their  
6 assistance with study conduction and laboratory measurements. **Funding** for this study was  
7 provided by T32HL007343 (M.P.), UL1TR001873 (G.R.S), partial funding for MP stipend and  
8 manuscript processing funds were supported by a donation from Robin Chemers Neustein to the  
9 Reyes-Soffer Laboratory.

10

## 1   **References**

- 2
- 3   1.    Reyes-Soffer G, Ginsberg HN, Berglund L, Duell PB, Heffron SP, Kamstrup PR, Lloyd-Jones  
4       DM, Marcovina SM, Yeang C, Koschinsky ML, et al. Lipoprotein(a): A Genetically  
5       Determined, Causal, and Prevalent Risk Factor for Atherosclerotic Cardiovascular  
6       Disease: A Scientific Statement From the American Heart Association. *Arterioscler*  
7       *Thromb Vasc Biol.* 2022;42:e48-e60.
- 8   2.    Tomoi Y, Takahara M, Soga Y, Kodama K, Imada K, Hiramori S, Ando K. Impact of High  
9       Lipoprotein(a) Levels on Clinical Outcomes Following Peripheral Endovascular Therapy.  
10      *JACC Cardiovasc Interv.* 2022;15:1466-1476. doi: 10.1016/j.jcin.2022.05.050
- 11 3.    Verwer MC, Waissi F, Mekke JM, Dekker M, Stroes ESG, de Borst GJ, Kroon J, Hazenberg  
12      C, de Kleijn DPV. High lipoprotein(a) is associated with major adverse limb events after  
13      femoral artery endarterectomy. *Atherosclerosis.* 2022;349:196-203. doi:  
14      10.1016/j.atherosclerosis.2021.11.019
- 15 4.    Tsimikas S. A Test in Context: Lipoprotein(a): Diagnosis, Prognosis, Controversies, and  
16      Emerging Therapies. *J Am Coll Cardiol.* 2017;69:692-711. doi: 10.1016/j.jacc.2016.11.042
- 17 5.    Tsimikas S, Kiechl S, Willeit J, Mayr M, Miller ER, Kronenberg F, Xu Q, Bergmark C, Weger  
18      S, Oberhollenzer F, et al. Oxidized phospholipids predict the presence and progression  
19      of carotid and femoral atherosclerosis and symptomatic cardiovascular disease: five-  
20      year prospective results from the Bruneck study. *J Am Coll Cardiol.* 2006;47:2219-2228.  
21      doi: 10.1016/j.jacc.2006.03.001
- 22 6.    Reyes-Soffer G, Westerterp M. Beyond Lipoprotein(a) plasma measurements:  
23      Lipoprotein(a) and inflammation. *Pharmacol Res.* 2021;169:105689. doi:  
24      10.1016/j.phrs.2021.105689
- 25 7.    Schmidt K, Noureen A, Kronenberg F, Utermann G. Structure, function, and genetics of  
26      lipoprotein (a). *J Lipid Res.* 2016;57:1339-1359. doi: 10.1194/jlr.R067314
- 27 8.    Masson W, Lobo M, Barbagelata L, Molinero G, Bluro I, Nogueira JP. Elevated  
28      lipoprotein (a) levels and risk of peripheral artery disease outcomes: A systematic  
29      review. *Vasc Med.* 2022;27:385-391. doi: 10.1177/1358863X221091320
- 30 9.    Dieplinger B, Lingenhel A, Baumgartner N, Poelz W, Dieplinger H, Haltmayer M,  
31      Kronenberg F, Mueller T. Increased serum lipoprotein(a) concentrations and low  
32      molecular weight phenotypes of apolipoprotein(a) are associated with symptomatic  
33      peripheral arterial disease. *Clin Chem.* 2007;53:1298-1305. doi:  
34      10.1373/clinchem.2007.088013
- 35 10.   Molgaard J, Klausen IC, Lassvik C, Faergeman O, Gerdes LU, Olsson AG. Significant  
36      association between low-molecular-weight apolipoprotein(a) isoforms and intermittent  
37      claudication. *Arterioscler Thromb.* 1992;12:895-901. doi: 10.1161/01.atv.12.8.895
- 38 11.   Ezhov MV, Safarova MS, Afanasieva OI, Kukharchuk VV, Pokrovsky SN. Lipoprotein(a)  
39      level and apolipoprotein(a) phenotype as predictors of long-term cardiovascular  
40      outcomes after coronary artery bypass grafting. *Atherosclerosis.* 2014;235:477-482. doi:  
41      10.1016/j.atherosclerosis.2014.05.944
- 42 12.   Kandelouei T, Abbasifard M, Imani D, Aslani S, Razi B, Fasihi M, Shafiekhani S,  
43      Mohammadi K, Jamialahmadi T, Reiner Z, et al. Effect of Statins on Serum level of hs-  
44      CRP and CRP in Patients with Cardiovascular Diseases: A Systematic Review and Meta-

- 1 Analysis of Randomized Controlled Trials. *Mediators Inflamm.* 2022;2022:8732360. doi:  
2 10.1155/2022/8732360
- 3 13. Sepehri Z, Masoumi M, Ebrahimi N, Kiani Z, Nasiri AA, Kohan F, Sheikh Fathollahi M,  
4 Kazemi Arababadi M, Asadikaram G. Atorvastatin, Losartan and Captopril Lead to  
5 Upregulation of TGF-beta, and Downregulation of IL-6 in Coronary Artery Disease and  
6 Hypertension. *PLoS One.* 2016;11:e0168312. doi: 10.1371/journal.pone.0168312
- 7 14. Biscetti F, Ferraro PM, Hiatt WR, Angelini F, Nardella E, Cecchini AL, Santoliquido A,  
8 Pitocco D, Landolfi R, Flex A. Inflammatory Cytokines Associated With Failure of Lower-  
9 Extremity Endovascular Revascularization (LER): A Prospective Study of a Population  
10 With Diabetes. *Diabetes Care.* 2019;42:1939-1945. doi: 10.2337/dc19-0408
- 11 15. Tsimikas S, Karwatowska-Prokopczuk E, Gouni-Berthold I, Tardif JC, Baum SJ,  
12 Steinhagen-Thiessen E, Shapiro MD, Stroes ES, Moriarty PM, Nordestgaard BG, et al.  
13 Lipoprotein(a) Reduction in Persons with Cardiovascular Disease. *N Engl J Med.*  
14 2020;382:244-255. doi: 10.1056/NEJMoa1905239
- 15 16. Mohammedi K, Pigeyre M, Bosch J, Yusuf S, Gerstein HC. Arm and ankle blood pressure  
16 indices, and peripheral artery disease, and mortality: a cohort study. *Eur Heart J.* 2024.  
17 doi: 10.1093/eurheartj/ehae087
- 18 17. Ioannis Kosmidis ECKP, Nicola Sartori Mean and median bias reduction in generalized  
19 linear models. *Statistics and Computing.* 2020;30:43-59. doi:  
20 <https://doi.org/10.1007/s11222-019-09860-6>
- 21 18. European Society of Hypertension-European Society of Cardiology Guidelines C. 2003  
22 European Society of Hypertension-European Society of Cardiology guidelines for the  
23 management of arterial hypertension. *J Hypertens.* 2003;21:1011-1053. doi:  
24 10.1097/00004872-200306000-00001
- 25 19. Yap T, Silickas J, Weerakkody R, Lea T, Santhirakumaran G, Bremner L, Diamantopoulos  
26 A, Biasi L, Thomas S, Zayed H, et al. Predictors of outcome in diabetic patients  
27 undergoing infrapopliteal endovascular revascularization for chronic limb-threatening  
28 ischemia. *J Vasc Surg.* 2022;75:618-624. doi: 10.1016/j.jvs.2021.09.040
- 29 20. Giovanetti F, Gargiulo M, Laghi L, D'Addato S, Maioli F, Muccini N, Borghi C, Stella A.  
30 Lipoprotein(a) and other serum lipid subfractions influencing primary patency after  
31 infrainguinal percutaneous transluminal angioplasty. *J Endovasc Ther.* 2009;16:389-396.  
32 doi: 10.1583/09-2733.1
- 33 21. Yanaka K, Akahori H, Imanaka T, Miki K, Yoshihara N, Kimura T, Tanaka T, Asakura M,  
34 Ishihara M. Impact of lipoprotein(a) levels on primary patency after endovascular  
35 therapy for femoropopliteal lesions. *Heart Vessels.* 2023;38:171-176. doi:  
36 10.1007/s00380-022-02151-7
- 37 22. Fudim M, Hopley CW, Huang Z, Kavanagh S, Rockhold FW, Baumgartner I, Berger JS,  
38 Blomster JI, Fowkes FGR, Katona BG, et al. Association of Hypertension and Arterial  
39 Blood Pressure on Limb and Cardiovascular Outcomes in Symptomatic Peripheral Artery  
40 Disease: The EUCLID Trial. *Circ Cardiovasc Qual Outcomes.* 2020;13:e006512. doi:  
41 10.1161/CIRCOUTCOMES.120.006512
- 42 23. Arinze N, Farber A, Levin SR, Cheng TW, Jones DW, Patel VI, Rybin D, Doros G, Siracuse  
43 JJ. Perioperative outcomes after lower extremity bypass and peripheral vascular

- 1 interventions in patients with morbid obesity and superobesity. *J Vasc Surg.*  
2 2020;71:567-574 e564. doi: 10.1016/j.jvs.2019.05.039
- 3 24. Dieter RS, Tomasson J, Gudjonsson T, Brown RL, Vitcenda M, Einerson J, McBride PE.  
4 Lower extremity peripheral arterial disease in hospitalized patients with coronary artery  
5 disease. *Vasc Med.* 2003;8:233-236. doi: 10.1191/1358863x03vm506ra
- 6 25. Hishikari K, Hikita H, Nakamura S, Nakagama S, Mizusawa M, Yamamoto T, Doi J, Utsugi  
7 Y, Sudo Y, Kimura S, et al. Usefulness of Lipoprotein(a) for Predicting Clinical Outcomes  
8 After Endovascular Therapy for Aortoiliac Atherosclerotic Lesions. *J Endovasc Ther.*  
9 2017;24:793-799. doi: 10.1177/1526602817728068
- 10 26. Guedon AF, De Freminville JB, Mirault T, Mohamedi N, Rance B, Fournier N, Paul JL,  
11 Messas E, Goudot G. Association of Lipoprotein(a) Levels With Incidence of Major  
12 Adverse Limb Events. *JAMA Netw Open.* 2022;5:e2245720. doi:  
13 10.1001/jamanetworkopen.2022.45720
- 14 27. Pearson GJ, Thanassoulis G, Anderson TJ, Barry AR, Couture P, Dayan N, Francis GA,  
15 Genest J, Gregoire J, Grover SA, et al. 2021 Canadian Cardiovascular Society Guidelines  
16 for the Management of Dyslipidemia for the Prevention of Cardiovascular Disease in  
17 Adults. *Can J Cardiol.* 2021;37:1129-1150. doi: 10.1016/j.cjca.2021.03.016
- 18 28. Kronenberg F, Mora S, Stroes ESG, Ference BA, Arsenault BJ, Berglund L, Dweck MR,  
19 Koschinsky M, Lambert G, Mach F, et al. Lipoprotein(a) in atherosclerotic cardiovascular  
20 disease and aortic stenosis: a European Atherosclerosis Society consensus statement.  
21 *Eur Heart J.* 2022;43:3925-3946. doi: 10.1093/eurheartj/ehac361
- 22 29. Grundy SM, Stone NJ, Bailey AL, Beam C, Birtcher KK, Blumenthal RS, Braun LT, de  
23 Ferranti S, Faiella-Tommasino J, Forman DE, et al. 2018  
24 AHA/ACC/AACVPR/AAPA/ABC/ACPM/ADA/AGS/APhA/ASPC/NLA/PCNA Guideline on  
25 the Management of Blood Cholesterol: Executive Summary: A Report of the American  
26 College of Cardiology/American Heart Association Task Force on Clinical Practice  
27 Guidelines. *J Am Coll Cardiol.* 2019;73:3168-3209. doi: 10.1016/j.jacc.2018.11.002
- 28 30. Viney NJ, Yeang C, Yang X, Xia S, Witztum JL, Tsimikas S. Relationship between "LDL-C",  
29 estimated true LDL-C, apolipoprotein B-100, and PCSK9 levels following lipoprotein(a)  
30 lowering with an antisense oligonucleotide. *J Clin Lipidol.* 2018;12:702-710. doi:  
31 10.1016/j.jacl.2018.02.014
- 32 31. Sniderman AD, Thanassoulis G, Glavinovic T, Navar AM, Pencina M, Catapano A, Ference  
33 BA. Apolipoprotein B Particles and Cardiovascular Disease: A Narrative Review. *JAMA*  
34 *Cardiol.* 2019;4:1287-1295. doi: 10.1001/jamacardio.2019.3780
- 35 32. Criqui MH, Matsushita K, Aboyans V, Hess CN, Hicks CW, Kwan TW, McDermott MM,  
36 Misra S, Ujueta F, American Heart Association Council on E, et al. Lower Extremity  
37 Peripheral Artery Disease: Contemporary Epidemiology, Management Gaps, and Future  
38 Directions: A Scientific Statement From the American Heart Association. *Circulation.*  
39 2021;144:e171-e191. doi: 10.1161/CIR.0000000000001005
- 40 33. Matveyenko A, Matienzo N, Ginsberg H, Nandakumar R, Seid H, Ramakrishnan R,  
41 Holleran S, Thomas T, Reyes-Soffer G. Relationship of apolipoprotein(a) isoform size  
42 with clearance and production of lipoprotein(a) in a diverse cohort. *J Lipid Res.*  
43 2023;64:100336. doi: 10.1016/j.jlr.2023.100336

- 1 34. Kraft HG, Lingenhel A, Kochl S, Hoppichler F, Kronenberg F, Abe A, Muhlberger V,  
2 Schonitzer D, Utermann G. Apolipoprotein(a) kringle IV repeat number predicts risk for  
3 coronary heart disease. *Arterioscler Thromb Vasc Biol.* 1996;16:713-719. doi:  
4 10.1161/01.atv.16.6.713
- 5 35. Boffa MB, Koschinsky ML. Lipoprotein (a): truly a direct prothrombotic factor in  
6 cardiovascular disease? *J Lipid Res.* 2016;57:745-757. doi: 10.1194/jlr.R060582
- 7 36. Caplice NM, Panetta C, Peterson TE, Kleppe LS, Mueske CS, Kostner GM, Broze GJ, Jr.,  
8 Simari RD. Lipoprotein (a) binds and inactivates tissue factor pathway inhibitor: a novel  
9 link between lipoproteins and thrombosis. *Blood.* 2001;98:2980-2987. doi:  
10 10.1182/blood.v98.10.2980
- 11 37. Patel AP, Wang M, Pirruccello JP, Ellinor PT, Ng K, Kathiresan S, Khera AV. Lp(a)  
12 (Lipoprotein[a]) Concentrations and Incident Atherosclerotic Cardiovascular Disease:  
13 New Insights From a Large National Biobank. *Arterioscler Thromb Vasc Biol.*  
14 2021;41:465-474. doi: 10.1161/ATVBAHA.120.315291
- 15 38. Sepehri Z, Masoumi M, Ebrahimi N, Kiani Z, Nasiri AA, Kohan F, Fathollahi MS, Arababadi  
16 MK, Asadikaram G. Correction: Atorvastatin, Losartan and Captopril Lead to  
17 Upregulation of TGF-beta, and Downregulation of IL-6 in Coronary Artery Disease and  
18 Hypertension. *PLoS One.* 2017;12:e0172404. doi: 10.1371/journal.pone.0172404
- 19 39. Bertoia ML, Pai JK, Lee JH, Taleb A, Joosten MM, Mittleman MA, Yang X, Witztum JL,  
20 Rimm EB, Tsimikas S, et al. Oxidation-specific biomarkers and risk of peripheral artery  
21 disease. *J Am Coll Cardiol.* 2013;61:2169-2179. doi: 10.1016/j.jacc.2013.02.047
- 22 40. Patel SM, Bonaca MP, Morrow DA, Palazzolo MG, Jarolim P, Steg PG, Bhatt DL, Storey  
23 RF, Sabatine MS, O'Donoghue ML. Lipoprotein(a) and Benefit of Antiplatelet Therapy:  
24 Insights From the PEGASUS-TIMI 54 Trial. *JACC: Advances.* 2023;2. doi:  
25 10.1016/j.jacadv.2023.100675
- 26 41. Cui K, Yin D, Zhu C, Song W, Wang H, Jia L, Zhang R, Wang H, Cai Z, Feng L, et al. How Do  
27 Lipoprotein(a) Concentrations Affect Clinical Outcomes for Patients With Stable  
28 Coronary Artery Disease Who Underwent Different Dual Antiplatelet Therapy After  
29 Percutaneous Coronary Intervention? *J Am Heart Assoc.* 2022;11:e023578. doi:  
30 10.1161/JAHA.121.023578
- 31 42. Marlys L. Koschinsky AB, Michael B. Boffa, Dave L. Dixon, Keith C. Ferdinand, Samuel S.  
32 Gidding, et al. A Focused Update to the 2019 NLA Scientific Statement on Use of  
33 Lipoprotein(a) in Clinical Practice. *Journal of Clinical Lipidology.* 2024.  
34

**Table I.** Baseline characteristics, lipid, and lipoprotein levels

| Characteristic                        | Study Sample         |                     |                     |
|---------------------------------------|----------------------|---------------------|---------------------|
| Age, y                                | 66.7 ± 9.7           |                     |                     |
| Range for age                         | 43-79                |                     |                     |
| BMI, kg/m <sup>2</sup>                | 28.1 ± 5.3           |                     |                     |
| <i>Race</i>                           | <i>Female (N=12)</i> | <i>Male (N=13)</i>  |                     |
| White                                 | 5                    | 7                   |                     |
| Black                                 | 3                    | 5                   |                     |
| Hispanic                              | 4                    | 1                   |                     |
| <i>Clinical Characteristics, n(%)</i> |                      |                     |                     |
| Diabetes mellitus                     | 14 (56%)             |                     |                     |
| Hypertension                          | 21 (84%)             |                     |                     |
| Hyperlipidemia                        | 20 (80%)             |                     |                     |
| History CAD                           | 7 (28%)              |                     |                     |
| Prior coronary event                  | 4 (16%)              |                     |                     |
| Ever smoker                           | 20 (80%)             |                     |                     |
| <i>Medical therapy, n(%)</i>          |                      |                     |                     |
| Statin                                | 19 (76%)             |                     |                     |
| Beta-blocker                          | 12 (48%)             |                     |                     |
| DAPT or AP + DOAC                     | 22 (88%)             |                     |                     |
| DOAC alone                            | 1 (4%)               |                     |                     |
| AP alone                              | 2 (8%)               |                     |                     |
| Total cholesterol, mg/dL              | 159 ± 46.1           |                     |                     |
| Triglycerides, mg/dL                  | 148 (105, 238)       |                     |                     |
| HDL-C, mg/dL                          | 39.8 ± 14.0          |                     |                     |
| Calculated-LDL, mg/dL*                | 78.7 ± 34.8          |                     |                     |
| Apo(a) weighted isoform size          | 18.4 ± 4.1           |                     |                     |
|                                       | <i>Black</i>         | <i>Hispanic</i>     | <i>White</i>        |
| Plasma Lp(a), nmol/L                  | 68.3 (34.0, 304.1)   | 228.6 (67.0, 333.0) | 125.9 (80.1, 191.3) |
| Plasma apoB100, mg/dL                 | 167.7 ± 45.1         | 225.6 ± 83.7        | 144.3 ± 59.2        |

Legend: ± represents Mean and Standard Deviation; ( ) represents Median and Interquartile Range.

\*Calculated LDL-C means reported for N=24, one subject had >400 mg/dL TG levels (Supplemental Table I).

Coronary artery disease (CAD); direct oral anticoagulant (DOAC), antiplatelet (AP), dual antiplatelet therapy (DAPT)

**Table IIa.** Effects of apo(a) *wIS* on surgical outcomes

| <b>Outcome</b>  | <b>Sample (N)</b> | <b>Firth Model Estimate (95% CI)</b> | <b>p Value</b>     |
|-----------------|-------------------|--------------------------------------|--------------------|
| Δ Symptoms      | 25                | 0.25 (-1.01, 1.50)                   | p=0.70             |
| Primary patency | 23                | <b>-2.81 (-5.57, -0.04)</b>          | <b>p &lt;0.05*</b> |
| Δ ABI           | 14                | 0.30 (-2.43, 3.01)                   | p=0.84             |
| Re-Intervention | 25                | <b>-0.53 (-2.59, 1.54)</b>           | <b>p=0.07</b>      |

**Table IIb.** Effects of Lp(a) on surgical outcomes

| <b>Outcome</b>  | <b>Sample (N)</b> | <b>Firth Model Estimate (95% CI)</b> | <b>p Value</b> |
|-----------------|-------------------|--------------------------------------|----------------|
| Δ Symptoms      | 25                | 0.17 (-0.89, 1.23)                   | p=0.75         |
| Primary patency | 23                | 0.32 (-0.68, 1.33)                   | p=0.53         |
| Δ ABI           | 14                | 0.92 (-1.57, 3.41)                   | p=0.47         |
| Re-intervention | 25                | 0.13 (-0.89, 1.15)                   | p=0.80         |

Legend: PAD: Peripheral Arterial Disease; *wIS*: weighted Isoform Size; Δ ABI: change in Ankle Brachial Index; Δ Symptoms: change in symptoms, *wIS* and Lp(a) were standardized, \*statistical significance =  $p < 0.05$ ; Firth model: exponential estimate (95% CI). Available number of subject data for each outcome (N=X) are provided. Complete ABI data is missing in 11 subjects



**Table III.** Comparison of inflammatory marker levels in Study Subjects and Healthy Controls.

| <b>Marker</b>        | <b>PAD Cohort</b> | <b>*Healthy Controls</b> |
|----------------------|-------------------|--------------------------|
| IL-6 (pg/mL)         | 3.3±2.5           | 0.01-11.5 <sup>38</sup>  |
| IL-18 (pg/mL)        | 274.2±147.5       | 80–120 <sup>39</sup>     |
| hs-CRP (mg/dL)       | 3.6±4.6           | <0.3 <sup>40</sup>       |
| TNF $\alpha$ (pg/mL) | 1.4±0.7           | 0 - 2.2                  |

Legend:  $\pm$  represents Mean and Standard Deviation; IL: Interleukin; CRP: C-reactive protein; TNF: Tumor Necrosis

Factor. Study Cohort N=25. \*Healthy controls from published literature

1 **Figure 1.** Negative relationship between Lp(a) levels and *wIS*

2

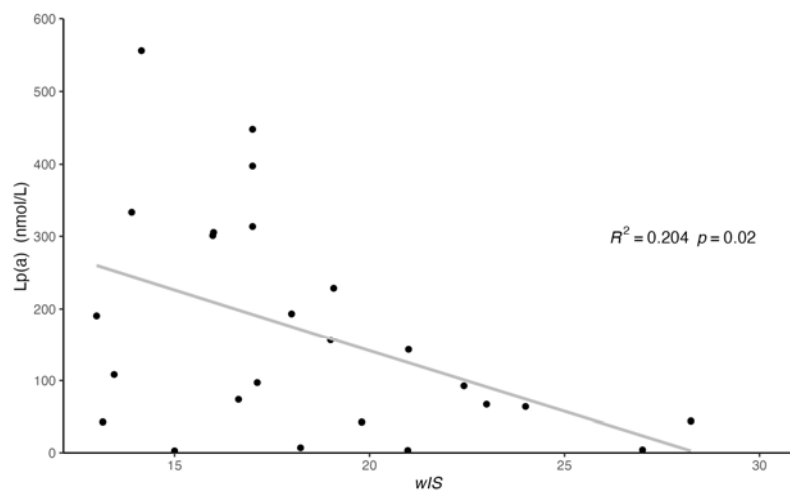

3

4 Legend: Lp(a): Lipoprotein(a); *wIS*: weighted Isoform Size.

5

6

7

1 **Figure 2.** Apo(a) size distribution by Lp(a) level quartiles (nmol/L)

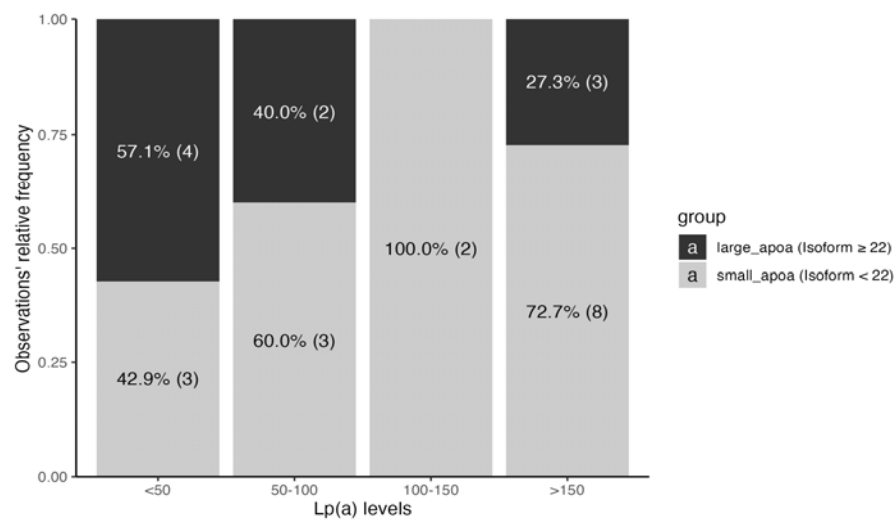

2  
3 Legend: Lp(a): Lipoprotein(a). Gray: small apo(a) isoforms; Black: large apo(a) isoforms. All data presented as  
4 percentages of study subjects and absolute numbers in ().

5

1 **Supplemental Data**

2  
3 **Supplemental Table I. Individual Subject Data**

4

| Subject Number | Lp(a) (nmol/L) | Isoform 1 | % Isoform 1 | Isoform 2 | % Isoform 2 | wIS   | SRRE |
|----------------|----------------|-----------|-------------|-----------|-------------|-------|------|
| 1              | 300.99         | 14        | 8%          | 25        | 18%         | 15.98 | B    |
| 2              | 97.10          | 17        | 97%         | 21        | 3%          | 17.12 | W    |
| 3              | 92.56          | 20        | 78%         | 31        | 22%         | 22.42 | W    |
| 4              | 3.40           | 19        | 82%         | 30        | 18%         | 20.98 | B    |
| 5              | 4.12           | 27        | 100%        |           |             | 27    | B    |
| 6              | 73.82          | 14        | 78%         | 26        | 22%         | 16.64 | B    |
| 7              | 193.26         | 18        | 100%        |           |             | 18    | W    |
| 8              | 190.63         | 13        | 100%        |           |             | 13    | W    |
| 9              | 228.60         | 18        | 82%         | 24        | 18%         | 19.08 | H    |
| 10             | 43.91          | 28        | 96%         | 34        | 4%          | 28.24 | B    |
| 11             | 397.62         | 17        | 100%        |           |             | 17    | H    |
| 12*            | 305.28         | 16        | 100%        |           |             | 16    | W    |
| 13             | 108.34         | 13        | 91%         | 18        | 9%          | 13.45 | W    |
| 14             | 448.08         | 17        | 100%        |           |             | 17    | W    |
| 15             | 332.96         | 14        | 90%         | 13        | 10%         | 13.9  | H    |
| 16             | 42.62          | 13        | 99%         | 29        | 1%          | 13.16 | W    |
| 17             | 313.38         | 17        | 100%        |           |             | 17    | B    |
| 18             | <2.80          | 15        | 100%        |           |             | 15    | W    |
| 19             | 63.84          | 24        | 100%        |           |             | 24    | B    |
| 20             | 42.47          | 19        | 84%         | 24        | 16%         | 19    | H    |
| 21             | 156.73         | 19        | 100%        |           |             | 19    | W    |
| 22             | 67.04          | 23        | 100%        |           |             | 23    | H    |
| 23             | 7.05           | 15        | 81%         | 32        | 19%         | 18.23 | W    |
| 24             | 143.43         | 21        | 100%        |           |             | 21    | W    |
| 25             | 556.02         | 14        | 99%         | 29        | 1%          | 14.15 | B    |

5 Legend: wIS – weighted Isoform Size; SRRE – Self Reported Race/Ethnicity. B-Black, W-White, H-Hispanic. Large isoform  $\geq 22$ ,  
6 Small isoform  $< 22$ . \*Calculated LDL-C not reported (TG levels  $> 400$  mg/dL).

8 **Supplemental Figure 1.** Apo(a) weighted isoform sizes in re-operative patients

9

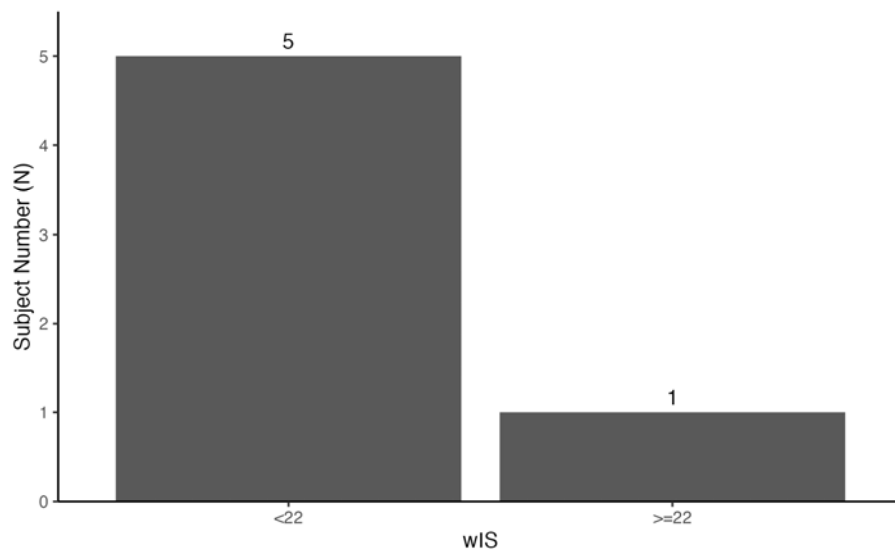

10

11 Legend: wIS – weighted Isoform Size, Subject Number (N) underwent re-operation at 3-6 months.

12

13 **Supplemental Figure 2.** ABALEAR study CONSORT flow diagram

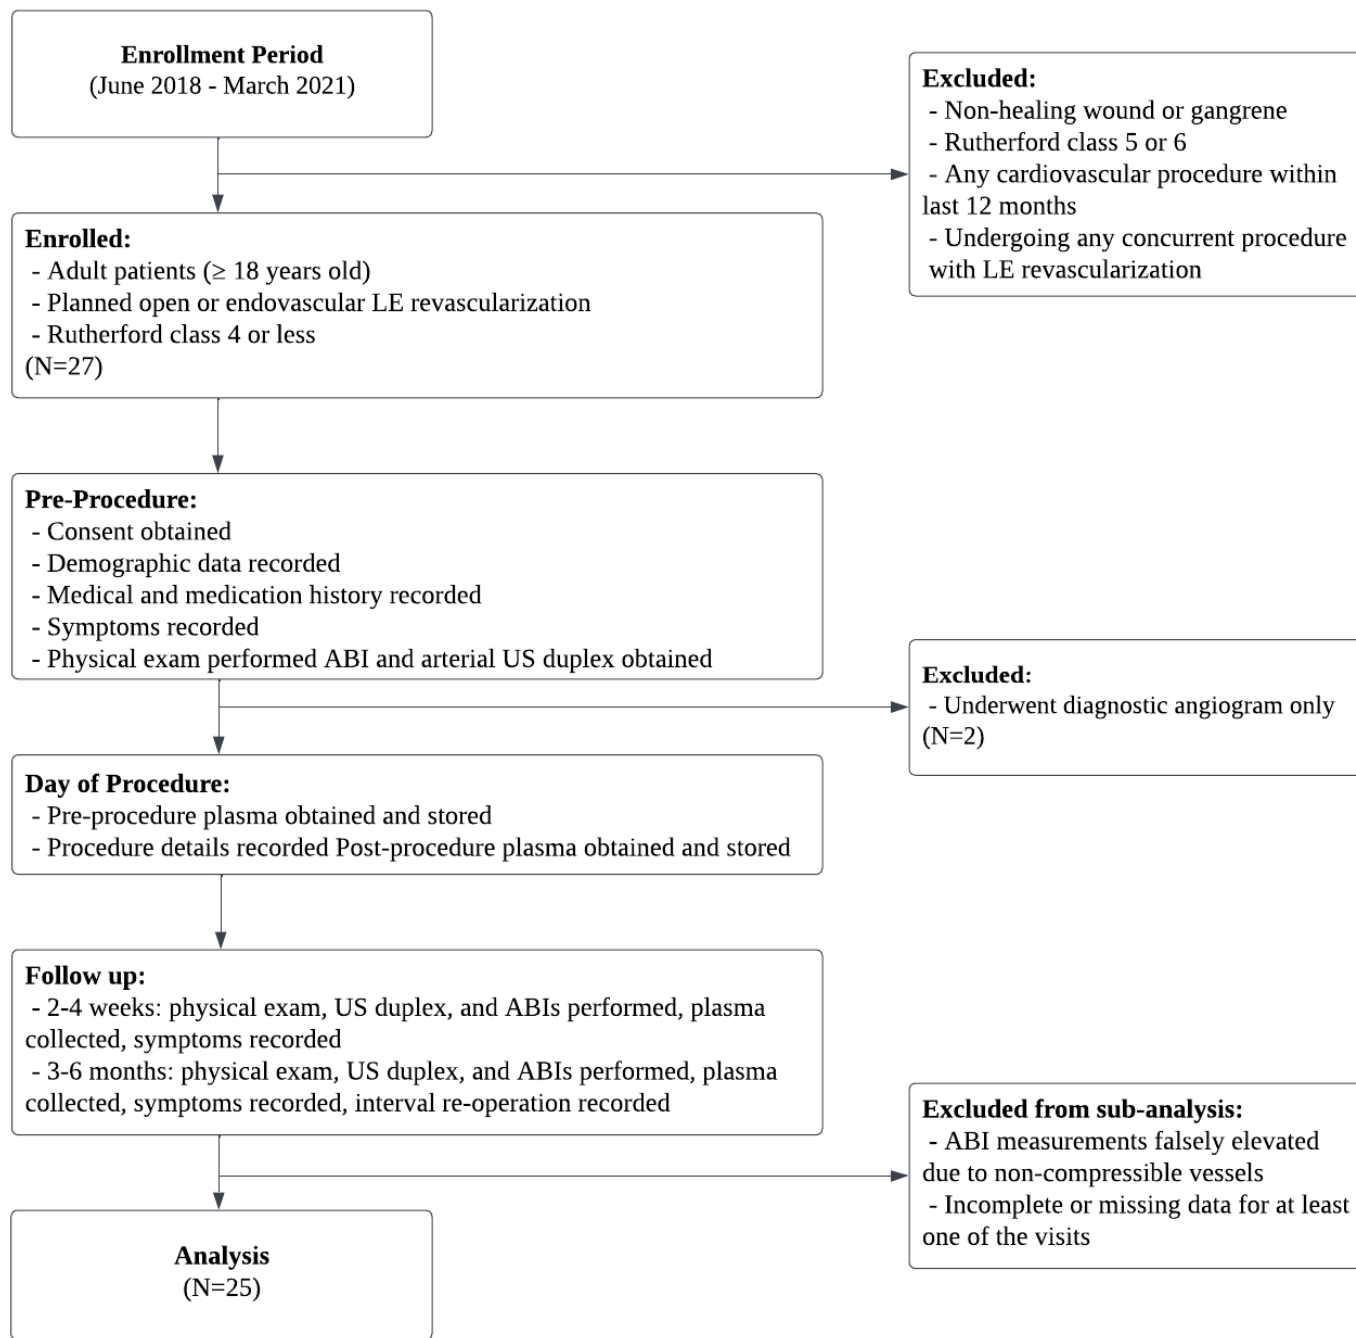

14  
15 Legend: LE—lower extremity; US—ultrasound; ABI—ankle brachial index; N—sample number
